# Supplementary material for: Mimotope vaccination for epitope-specific induction of anti-VEGF antibodies
Source: PubMed Central journal article supplement (PMC3849980; doi:10.1186/1472-6750-13-77), 2013-09-27
Supplement: 1472-6750-13-77-S1.pdf [file 1472-6750-13-77-S1.pdf]

**A****Candidate Epitope:**

A1 R2 R2 K26 A1 R2 Q3 Q3 R2 E4 K26 P6 A1 R2 Q3 V19 A1 V19 A1 Q3 A1 R2 E4 Q23 R2 Q3 Q23  
 A1 R2 E4 V19 R2 Q23 A1 R2 Q3 Q3 D21 P22 T24

**Alignments for each mimotope:**

| Resulting Path                          | Mimotope     | score |
|-----------------------------------------|--------------|-------|
| D21 Q23 T24 Q23 Q3 Q3 Q3 A1 R2 Q3 E4 P6 | DHTLYTPYHTHP | 23    |
| D21 Q23 T24 A1 Q23 Q3 Q3 Q3 A1 R2 A1 Q3 | NHFGKFLDALAG | 17    |
| --- --- E4 Q3 R2 E4 P6 A1 E4 ---        | WLEMHWPAHS   | 14    |

**B**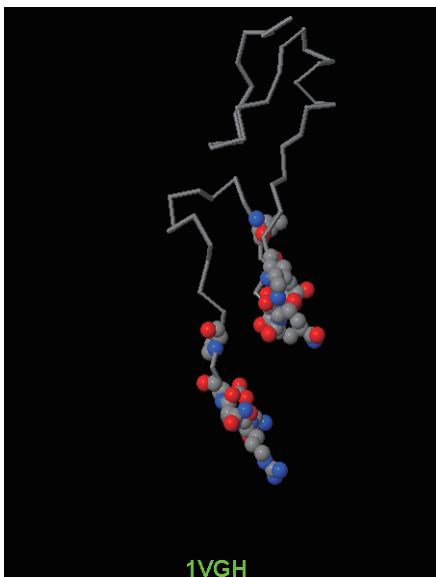**C**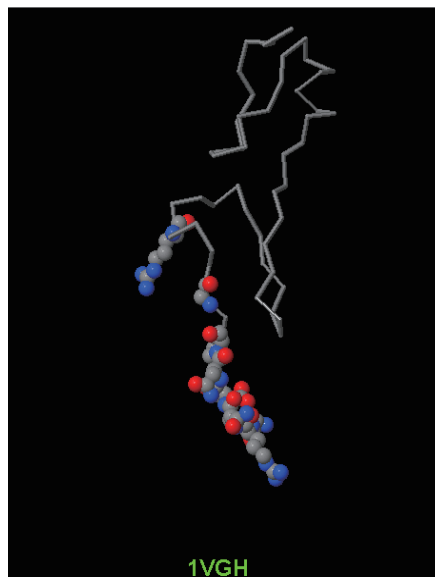**D**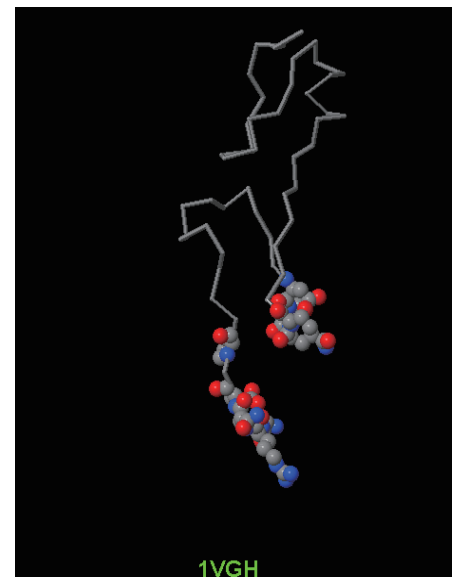

Figure S1. 3D images of the results from MimoPro. The patch with the highest score is selected as a potential candidate for the native epitope. (A) In section “Candidate Epitope”, all potential amino acids are listed and each amino acid is printed in the format of [Single letter identifier][No. in chain]. In the section “Alignment for each mimotope”, the resultant alignments for individual peptide sequences are tabulated. 3D analysis (B) 12P, (C) NHFGKFLDALAG and (D) M074\_D12 are shown. The candidate epitopes of 1VGH are shown in the shape of spacefill and cpk color format with the rest amino acids in backbone.
